# Supplementary material for: Canopy-Height and Stand-Age Estimation in Northeast China at Sub-Compartment Level Using Multi-Resource Remote Sensing Data
Source: MDPI journal article supplement (doi:10.3390/rs15153738), 2023-07-27
Supplement: s1 [file s1]

Archive with 1 entries (1 files):
- remotesensing-2458934-Supplementary Material.pdf
