# Supplementary material for: Canopy-Height and Stand-Age Estimation in Northeast China at Sub-Compartment Level Using Multi-Resource Remote Sensing Data
Source: MDPI journal article supplement (doi:10.3390/rs15153738), 2023-07-27
Supplement: s1 [file s1 › remotesensing-2458934-Supplementary Material.pdf]

**Table S1. 67 variables were extracted from the satellite image data.**

| Variable   | Formular                                                                                                          | Description                                                   |
|------------|-------------------------------------------------------------------------------------------------------------------|---------------------------------------------------------------|
| B2         | Blue, 450nm - 510nm                                                                                               | Reflectance of the Landsat-8 blue light band                  |
| B3         | Green, 525nm - 600nm                                                                                              | Reflectance of the Landsat-8 green light band                 |
| B4         | Red, 640nm - 670nm                                                                                                | Reflectance of the Landsat-8 red light band                   |
| B5         | Nir, 850nm - 880nm                                                                                                | Reflectance of the Landsat-8 near-infrared light band         |
| B6         | SWIR1, 1560nm - 1660nm                                                                                            | Reflectance of the Landsat-8 short-wave infrared 1 light band |
| B7         | SWIR2, 2100nm - 2300nm                                                                                            | Reflectance of the Landsat-8 short-wave infrared 2 light band |
| Wetness    | $0.1509 \times B2 + 0.1973 \times B3 + 0.3279 \times B4 + 0.3406 \times B5 - 0.7112 \times B6 - 0.4572 \times B7$ | Tasseled Cap (KT) transformation wetness                      |
| Brightness | $0.2848 \times B2 - 0.2435 \times B3 - 0.5436 \times B4 + 0.5585 \times B5 + 0.5082 \times B6 - 0.1800 \times B7$ | Tasseled Cap (KT) transformation brightness                   |
| Greeness   | $0.3037 \times B2 - 0.2793 \times B3 + 0.4743 \times B4 + 0.7243 \times B5 + 0.0840 \times B6 + 0.1863 \times B7$ | Tasseled Cap (KT) transformation Greeness                     |
| GCI        | $B5 / B3 - 1$                                                                                                     | Green Chlorophyll vegetation index                            |
| SAVI       | $(B5 - B4) \times (1 + 0.5) / (B5 + B4 + 0.5)$                                                                    | Vegetation index for adjusting soil brightness                |
| VARI       | $(B3 - B4) / (B3 + B4 - B2)$                                                                                      | Visible atmospheric impedance vegetation index                |
| RVI        | $B5 / B4$                                                                                                         | Ratio vegetation index                                        |
| EVI        | $2.5 \times (B5 - B4) / (B5 + 6.0 \times B4 - 7.5 \times B2 + 1)$                                                 | Enhanced vegetation index                                     |
| DVI        | $B5 - B4$                                                                                                         | Difference vegetation index                                   |
| Slope      | -                                                                                                                 | Slope extracted from DEM data                                 |
| ND563      | $(B5 + B6 - B3) \times (B5 + B6 + B3)$                                                                            | Normalized difference vegetation index                        |
| ND67       | $(B7 - B6) \times (B7 + B6)$                                                                                      | Normalized difference vegetation index                        |
| ND35       | $(B5 - B3) \times (B5 + B3)$                                                                                      | Normalized difference vegetation index                        |
| ND56       | $(B6 - B5) \times (B6 + B5)$                                                                                      | Normalized difference vegetation index                        |
| ND25       | $(B5 - B2) \times (B5 + B2)$                                                                                      | Normalized difference vegetation index                        |
| ND26       | $(B6 - B2) \times (B6 + B2)$                                                                                      | Normalized difference vegetation index                        |
| ND36       | $(B6 - B3) \times (B6 + B3)$                                                                                      | Normalized difference vegetation index                        |
| ND46       | $(B6 - B4) \times (B6 + B4)$                                                                                      | Normalized difference vegetation index                        |
| ND45       | $(B5 - B4) \times (B5 + B4)$                                                                                      | Normalized difference vegetation index                        |
| ME2        | $\sum_{i,j=0}^{N-1} iP_{ij}$                                                                                      | Mean of the four directional textural features of band 2      |
| ME3        | $\sum_{i,j=0}^{N-1} iP_{ij}$                                                                                      | Mean of the four directional textural features of band 3      |
| ME4        | $\sum_{i,j=0}^{N-1} iP_{ij}$                                                                                      | Mean of the four directional textural features of band 4      |

|      |                                                     |                                                               |
|------|-----------------------------------------------------|---------------------------------------------------------------|
| ME5  | $\sum_{i,j=0}^{N-1} iP_{ij}$                        | Mean of the four directional textural features of band 5      |
| ME6  | $\sum_{i,j=0}^{N-1} iP_{ij}$                        | Mean of the four directional textural features of band 6      |
| ME7  | $\sum_{i,j=0}^{N-1} iP_{ij}$                        | Mean of the four directional textural features of band 7      |
| Var2 | $\sum_{i,j=0}^{N-1} P_{i,j}(i - ME)^2$              | Sum variance of the gray-level co-occurrence matrix of band 2 |
| Var3 | $\sum_{i,j=0}^{N-1} P_{i,j}(i - ME)^2$              | Sum variance of the gray-level co-occurrence matrix of band 3 |
| Var4 | $\sum_{i,j=0}^{N-1} P_{i,j}(i - ME)^2$              | Sum variance of the gray-level co-occurrence matrix of band 4 |
| Var5 | $\sum_{i,j=0}^{N-1} P_{i,j}(i - ME)^2$              | Sum variance of the gray-level co-occurrence matrix of band 5 |
| Var6 | $\sum_{i,j=0}^{N-1} P_{i,j}(i - ME)^2$              | Sum variance of the gray-level co-occurrence matrix of band 6 |
| Var7 | $\sum_{i,j=0}^{N-1} P_{i,j}(i - ME)^2$              | Sum variance of the gray-level co-occurrence matrix of band 7 |
| Ho2  | $\sum_{i,j=0}^{N-1} i \frac{P_{ij}}{1 + (i - j)^2}$ | Homogeneity of the gray-level co-occurrence matrix of band 2  |
| Ho3  | $\sum_{i,j=0}^{N-1} i \frac{P_{ij}}{1 + (i - j)^2}$ | Homogeneity of the gray-level co-occurrence matrix of band 3  |
| Ho4  | $\sum_{i,j=0}^{N-1} i \frac{P_{ij}}{1 + (i - j)^2}$ | Homogeneity of the gray-level co-occurrence matrix of band 4  |
| Ho5  | $\sum_{i,j=0}^{N-1} i \frac{P_{ij}}{1 + (i - j)^2}$ | Homogeneity of the gray-level co-occurrence matrix of band 5  |
| Ho6  | $\sum_{i,j=0}^{N-1} i \frac{P_{ij}}{1 + (i - j)^2}$ | Homogeneity of the gray-level co-occurrence matrix of band 6  |

|      |                                                     |                                                                |
|------|-----------------------------------------------------|----------------------------------------------------------------|
| Ho7  | $\sum_{i,j=0}^{N-1} i \frac{P_{ij}}{1 + (i - j)^2}$ | Homogeneity of the gray-level co-occurrence matrix of band 7   |
| Con2 | $\sum_{i,j=0}^{N-1} (i - j)^2 P(i, j)$              | Contrast of the gray-level co-occurrence matrix of band 2      |
| Con3 | $\sum_{i,j=0}^{N-1} (i - j)^2 P(i, j)$              | Contrast of the gray-level co-occurrence matrix of band 3      |
| Con4 | $\sum_{i,j=0}^{N-1} (i - j)^2 P(i, j)$              | Contrast of the gray-level co-occurrence matrix of band 4      |
| Con5 | $\sum_{i,j=0}^{N-1} (i - j)^2 P(i, j)$              | Contrast of the gray-level co-occurrence matrix of band 5      |
| Con6 | $\sum_{i,j=0}^{N-1} (i - j)^2 P(i, j)$              | Contrast of the gray-level co-occurrence matrix of band 6      |
| Con7 | $\sum_{i,j=0}^{N-1} (i - j)^2 P(i, j)$              | Contrast of the gray-level co-occurrence matrix of band 7      |
| Dis2 | $\sum_{i,j=0}^{N-1} P_{i,j}  i - j $                | Dissimilarity of the gray-level co-occurrence matrix of band 2 |
| Dis3 | $\sum_{i,j=0}^{N-1} P_{i,j}  i - j $                | Dissimilarity of the gray-level co-occurrence matrix of band 3 |
| Dis4 | $\sum_{i,j=0}^{N-1} P_{i,j}  i - j $                | Dissimilarity of the gray-level co-occurrence matrix of band 4 |
| Dis5 | $\sum_{i,j=0}^{N-1} P_{i,j}  i - j $                | Dissimilarity of the gray-level co-occurrence matrix of band 5 |
| Dis6 | $\sum_{i,j=0}^{N-1} P_{i,j}  i - j $                | Dissimilarity of the gray-level co-occurrence matrix of band 6 |
| Dis7 | $\sum_{i,j=0}^{N-1} P_{i,j}  i - j $                | Dissimilarity of the gray-level co-occurrence matrix of band 7 |
| SM2  | $\sum_{i,j=0}^{N-1} P_{i,j}$                        | Angular second moment of band 2                                |

|      |                                                                                       |                                                                                        |
|------|---------------------------------------------------------------------------------------|----------------------------------------------------------------------------------------|
| SM3  | $\sum_{i,j=0}^{N-1} P_{i,j}$                                                          | Angular second moment of band 3                                                        |
| SM4  | $\sum_{i,j=0}^{N-1} P_{i,j}$                                                          | Angular second moment of band 4                                                        |
| SM5  | $\sum_{i,j=0}^{N-1} P_{i,j}$                                                          | Angular second moment of band 5                                                        |
| SM6  | $\sum_{i,j=0}^{N-1} P_{i,j}$                                                          | Angular second moment of band 6                                                        |
| SM7  | $\sum_{i,j=0}^{N-1} P_{i,j}$                                                          | Angular second moment of band 7                                                        |
| Cor2 | $\sum_{i,j=0}^{N-1} iP_{ij} \left[ \frac{(i - ME)(j - ME)}{\sqrt{VA_i VA_j}} \right]$ | The correlation texture between the grey levels and those neighboring pixels of band 2 |
| Cor3 | $\sum_{i,j=0}^{N-1} iP_{ij} \left[ \frac{(i - ME)(j - ME)}{\sqrt{VA_i VA_j}} \right]$ | The correlation texture between the grey levels and those neighboring pixels of band 3 |
| Cor4 | $\sum_{i,j=0}^{N-1} iP_{ij} \left[ \frac{(i - ME)(j - ME)}{\sqrt{VA_i VA_j}} \right]$ | The correlation texture between the grey levels and those neighboring pixels of band 4 |
| Cor5 | $\sum_{i,j=0}^{N-1} iP_{ij} \left[ \frac{(i - ME)(j - ME)}{\sqrt{VA_i VA_j}} \right]$ | The correlation texture between the grey levels and those neighboring pixels of band 5 |
| Cor6 | $\sum_{i,j=0}^{N-1} iP_{ij} \left[ \frac{(i - ME)(j - ME)}{\sqrt{VA_i VA_j}} \right]$ | The correlation texture between the grey levels and those neighboring pixels of band 6 |
| Cor7 | $\sum_{i,j=0}^{N-1} iP_{ij} \left[ \frac{(i - ME)(j - ME)}{\sqrt{VA_i VA_j}} \right]$ | The correlation texture between the grey levels and those neighboring pixels of band 7 |

---
